# Supplementary material for: Discovery of a peculiar insular race of Ravenna nivea (Nire, 1920) (Lepidoptera: Lycaenidae) endemic to Yinggeling Mountain of Hainan, suggesting heterogeneous geological history of mountain formation of the island
Source: PeerJ. 2024 Apr 23;12:e17172. doi: 10.7717/peerj.17172 (PMC11048081; doi:10.7717/peerj.17172)
Supplement: Supplemental Information 1 — Names of taxa adopt those prior to taxonomic decisions. [file peerj-12-17172-s001.xlsx]

## Sheet: 工作表1
Voucher number	Taxon Name	Collection Date	Country/Region		Location	GenBank Accession
YF150056	ssp. ngiunmoiae	2014-05-13	China	Hainan Prov.	Yinggeling	OR667041
YF160106	ssp. howarthi	2016-04-16	China	Hainan Prov.	Bawangling	OR667042
YF160107	ssp. howarthi	2016-04-17	China	Guizhou Prov.	Fanjingshan	OR667043
YF160108	ssp. howarthi	2016-04-17	China	Guizhou Prov.	Fanjingshan	OR667044
YF160109	ssp. ngiunmoiae	2016-04-19	China	Hainan Prov	Yinggeling	OR667045
YF170001	ssp. howarthi	2015-05-05	China	Zhejiang Prov.	Shenlongchun	OR667046
YF170002	ssp. howarthi	2015-05-03	China	Zhejiang Prov.	Shenlongchun	OR667047
YF170116	ssp. howarthi	2017-04-12	China	Guizhou Prov.	Fanjingshan	OR667048
YF170147	ssp. nivea	2015-04-03	Taiwan	Taizhong City	Dongmaoshan	OR667049
YF170148	ssp. nivea	2015-04-02	Taiwan	Taizhong City	Malunshan	OR667050
YF170149	ssp. nivea	2015-04-03	Taiwan	Taizhong City	Dongmaoshan	OR667051
YF170150	ssp. nivea	2016-04-10	Taiwan	Hualian Co.	Zhuoxi Township	OR667052
YF170156	ssp. howarthi	2017-04-14	China	Guizhou Prov.	Fanjing Mountain	OR667053
YF170157	ssp. howarthi	2017-04-14	China	Guizhou Prov.	Fanjing Mountain	OR667054
YF170158	ssp. howarthi	2017-04-14	China	Guizhou Prov.	Fanjing Mountain	OR667055
YF170159	ssp. ngiunmoiae	2016-02-26	China	Hainan Prov.	Yinggeling	OR667056
YF170160	ssp. ngiunmoiae	2015-03-09	China	Hainan Prov.	Yinggeling	OR667057
YF170161	ssp. howarthi	2016-04-17	China	Hainan Prov.	Bawangling	OR667058
YF170162	ssp. howarthi	2016-04-22	China	Guizhou Prov.	Fanjing Mountain	OR667059
YF170189	ssp. nivea	2017-05-20	Taiwan	Taizhong City	Malunshan	OR667060
YF170190	ssp. nivea	2017-05-20	Taiwan	Taizhong City	Malunshan	OR667061
YF170191	ssp. nivea	2017-05-20	Taiwan	Taizhong City	Malunshan	OR667062
YF170192	ssp. howarthi	2017-04-21	China	Guizhou Prov.	Fanjingshan	OR667063
YF170193	ssp. howarthi	2017-04-21	China	Guizhou Prov.	Fanjingshan	OR667064
YF170194	ssp. howarthi	2017-04-21	China	Guizhou Prov.	Fanjingshan	OR667065
YF170195	ssp. howarthi	2017-04-21	China	Guizhou Prov.	Fanjingshan	OR667066
YF170196	ssp. howarthi	2017-04-21	China	Guizhou Prov.	Fanjingshan	OR667067
YF170241	ssp. howarthi	2017-05-02	China	Jiangxi Prov.	Jinggangshan	OR667068
YF170242	ssp. howarthi	2017-05-02	China	Jiangxi Prov.	Jinggangshan	OR667069
YF170244	ssp. howarthi	2016/3/29-4/1	China	Hainan Prov.	Bawangling	OR667070
YF170245	ssp. howarthi	2016/3/29-4/1	China	Hainan Prov.	Bawangling	OR667071
YF170246	ssp. howarthi	2016/3/29-4/1	China	Hainan Prov.	Bawangling	OR667072
YF170247	ssp. howarthi	2016/3/29-4/1	China	Hainan Prov.	Bawangling	OR667073
YF170248	ssp. howarthi	2016/3/29-4/1	China	Hainan Prov.	Bawangling	OR667074
YF170249	ssp. howarthi	2016/3/29-4/1	China	Hainan Prov.	Bawangling	OR667075
YF170250	ssp. howarthi	2016/3/29-4/1	China	Hainan Prov.	Bawangling	OR667076
YF170251	ssp. nivea	2016-07-18	Taiwan	Miaoli Co.	Niaozuishan	OR667077
YF170288	ssp. howarthi	2017-05-27	China	Zhejiang Prov.	Shaoxing, Zhuji	OR667078
YF170289	ssp. howarthi	2017-05-27	China	Zhejiang Prov.	Shaoxing, Zhuji	OR667079
YF170290	ssp. howarthi	2017-05-27	China	Zhejiang Prov.	Shaoxing, Zhuji	OR667080
YF170291	ssp. howarthi	2017-05-27	China	Zhejiang Prov.	Shaoxing, Zhuji	OR667081
YF170292	ssp. howarthi	2017-05-27	China	Zhejiang Prov.	Shaoxing, Zhuji	OR667082
YF170293	ssp. howarthi	2017-05-27	China	Zhejiang Prov.	Shaoxing, Zhuji	OR667083
YF170294	ssp. howarthi	2017-05-27	China	Zhejiang Prov.	Shaoxing, Zhuji	OR667084
YF180016	ssp. nivea	2015-04-20	Taiwan	Pingdong Co.	Wutai, Ali	OR667085
YF180017	ssp. nivea	2015-04-21	Taiwan	Pingdong Co.	Wutai, Ali	OR667086
YF180018	ssp. nivea	2015-04-15	Taiwan	Pingdong Co.	Wutai, Ali	OR667087
YF180019	ssp. nivea	2015-04-20	Taiwan	Pingdong Co.	Wutai, Ali	OR667088
YF180020	ssp. nivea	2015-05-03	Taiwan	Pingdong Co.	Wutai, Ali	OR667089
YF180021	ssp. nivea	2015-05-03	Taiwan	Pingdong Co.	Wutai, Ali	OR667090
YF180022	ssp. nivea	2015-05-06	Taiwan	Pingdong Co.	Wutai, Ali	OR667091
YF180023	ssp. nivea	2015-06-11	Taiwan	Taizhong City	Malunshan	OR667092
YF180024	ssp. nivea	2015-04-08	Taiwan	Taizhong City	Malunshan	OR667093
YF180025	ssp. nivea	2015-04-11	Taiwan	Taizhong City	Malunshan	OR667094
YF180026	ssp. nivea	2015-04-11	Taiwan	Taizhong City	Malunshan	OR667095
YF180027	ssp. nivea	2015-04-10	Taiwan	Taizhong City	Malunshan	OR667096
YF180028	ssp. nivea	2015-04-18	Taiwan	Nantou Co.	Renai	OR667097
YF180029	ssp. nivea	2015-04-26	Taiwan	Nantou Co.	Xinyi, Batongguan	OR667098
YF180030	ssp. nivea	2015-10-25	Taiwan	Taoyuan City	Xuewunao	OR667099
YF180031	ssp. nivea	2015-01-25	Taiwan	Taoyuan City	Xuewunao	OR667100
YF180032	ssp. nivea	2015-03-08	Taiwan	Taoyuan City	Xuewunao	OR667101
YF180033	ssp. nivea	2015-03-08	Taiwan	Taoyuan City	Xuewunao	OR667102
YF180034	ssp. nivea	2015-02-13	Taiwan	Taoyuan City	Lalashan	OR667103
YF180035	ssp. nivea	2015-02-12	Taiwan	Taoyuan City	Fufushan	OR667104
YF180036	ssp. nivea	2015-03-25	Taiwan	Taoyuan City	Fufushan	OR667105
YF180059	ssp. miyagawai	2015-05-16	Vietnam	Khanh Hoa Prov.	Mt. Hon Ba	OR667106
YF180060	ssp. miyagawai	2015-05-10	Vietnam	Khanh Hoa Prov.	Mt. Hon Ba	OR667107
YF181243	ssp. howarthi	2018-04-09	China	Fujian Prov.	Fuzhou	OR667108
YF181261	ssp. howarthi	2018-04-10	China	Guangdong Prov.	Shaoguan	OR667109
YF181262	ssp. howarthi	2018-04-11	China	Fujian Prov.	Fuzhou	OR667110
YF181542	ssp. howarthi	2018-04-21	China	Guangdong Prov.	Shaoguan	OR667111
YF181544	ssp. miyagawai	2018-03-06	Vietnam	Thua Thien Hue	Bach Mã	OR667112
YF181545	ssp. miyagawai	2018-03-08	Vietnam	Thua Thien Hue	Bach Mã	OR667113
YF181546	ssp. miyagawai	2018-03-09	Vietnam	Thua Thien Hue	Bach Mã	OR667114
YF181594	ssp. miyagawai	2018-04-22	Vietnam	Thua Thien Hue	Bach Mã	OR667115
YF181677	ssp. howarthi	2018-04-30	China	Jiangxi Prov.	Jinggangshan	OR667116
YF181678	ssp. howarthi	2018-04-30	China	Jiangxi Prov.	Jinggangshan	OR667117
YF181706	ssp. howarthi	2018-05-01	China	Jiangxi Prov.	Jinggangshan	OR667118
YF181768	ssp. howarthi	2018-05-02	China	Jiangxi Prov.	Jinggangshan	OR667119
L5220	ssp. nivea		Taiwan	Hualian Co.	Xiulin	OR667039
L6198	Leucantigius atayalicus		Taiwan	Hualian Co.	Xiulin,	OR667040
L1345	Yamamotozephyrus kwangtungensis		China			OR667038
